# Supplementary material for: Identification of whole‐genome significant single nucleotide polymorphisms in candidate genes associated with body conformation traits in Chinese Holstein cattle
Source: PubMed Central journal article supplement (PMC7003999; doi:10.1111/age.12865), 2019-10-21
Supplement: AGE-51-141-s001.pdf [file AGE-51-141-s001.pdf]

**A**

Manhattan:RA

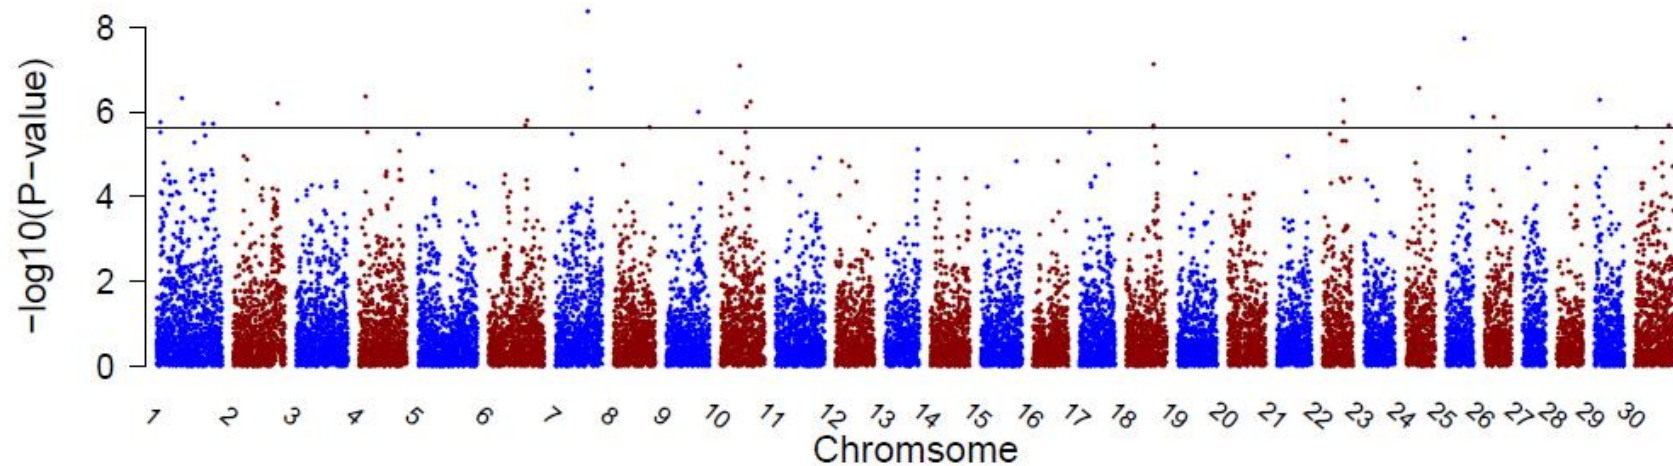**B**

Manhattan:FS

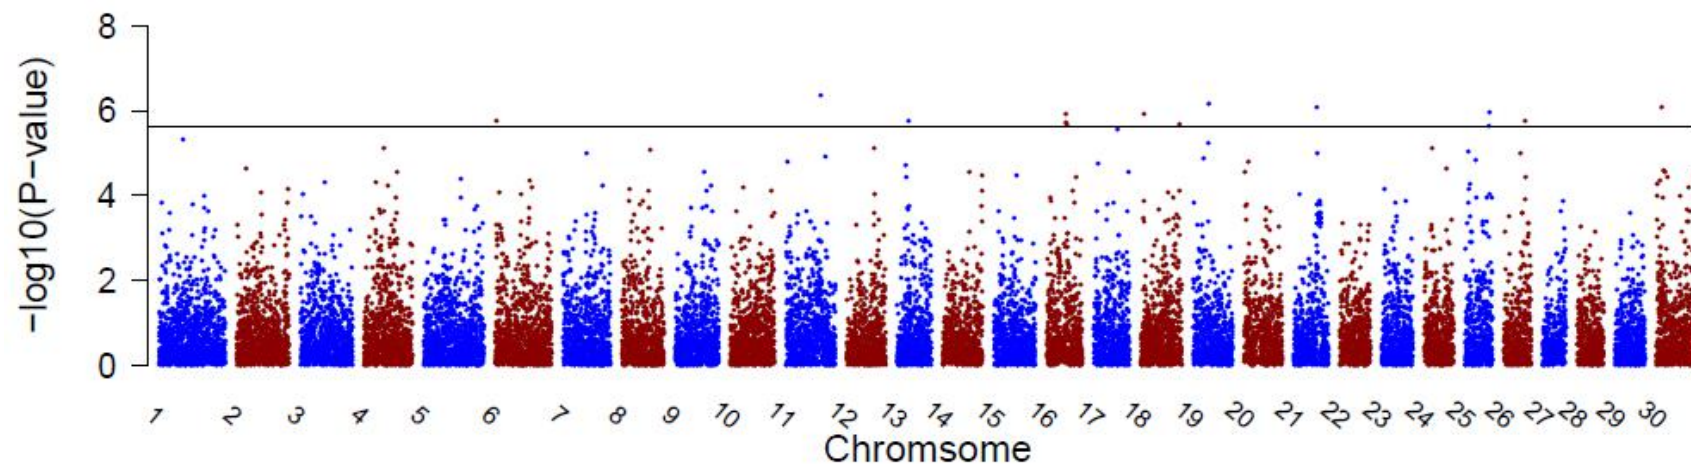

**Figure S1.** Genome-wide plots of  $-\log_{10}$  ( $P$ -value) SNP association effects on body confirmation trait of rump angle (RA, A) and final score (FS, B) obtained by mixed-effect linear regression model (MLM). The scale on the x-axis represents the physical length along each chromosome, wherein chromosome 30 refer to X chromosome, which was considered as an autosome because of overall female cattle in the studied population. The scale on the y-axis is the  $-\log_{10}$  ( $P$ -value) SNP association effects. The solid line represents 5% of genome-wide significance with the corresponding raw  $P$ -value being equal to  $2.42 \times 10^{-6}$ .
